# Supplementary material
Source: PubMed Central journal article supplement (PMC5328169)
Supplement: ASN.2016060611SupplementaryData.pdf [file ASN.2016060611SupplementaryData.pdf]

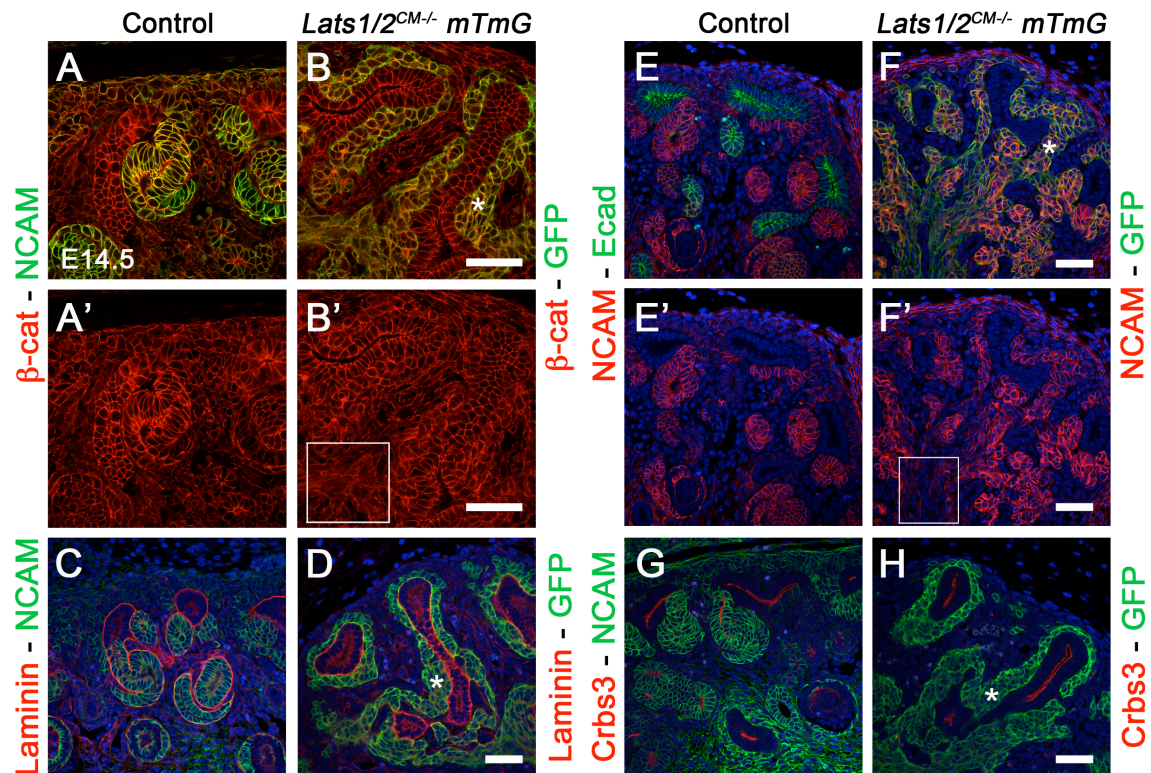

**Supplemental figure 1: *Lats1* and *Lats2* deletion induces loss of epithelial characteristics**

(A-H)  $\beta$ -catenin, Laminin, NCAM and Crumbs3 staining in control and *Lats1/2*<sup>CM-/-</sup> E14.5 kidneys. Co-staining with NCAM (in control) and GFP antibody (in *Lats1/2*<sup>CM-/-</sup> *mTmG*) mark NP-derived cells. Note the reduced  $\beta$ -catenin and NCAM staining in medullary accumulated interstitial cells of *Lats1/2*<sup>CM-/-</sup> kidneys (boxes in B' and F'). Also, no Crumbs3 staining could be found in NP-derived cells in *Lats1/2*<sup>CM-/-</sup> kidneys consistent with the absence of tubulogenesis. Scale bars represent 50  $\mu$ m.

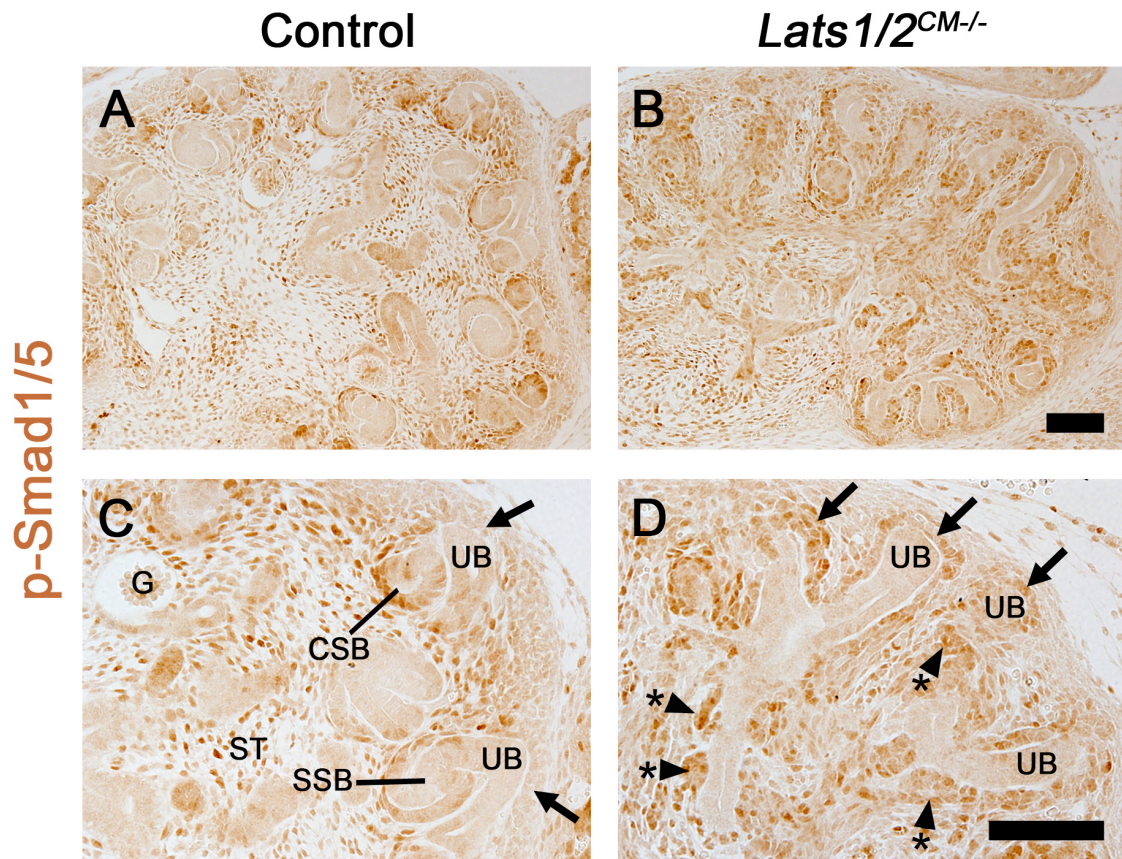

**Supplemental figure 2: Increase p-Smad1/5 staining in *Lats1/2*<sup>CM-/-</sup> kidneys**

(A-D) Staining at E14.5 revealed increase nuclear phospho-Smad1/5 in both NPCs (arrows) and derived cells (arrowheads) in *Lats1/2*<sup>CM-/-</sup> compared to NPCs and early nephrons (CSB, SSB) in controls. Scale bars represent 100  $\mu$ m.
